# Supplementary material for: Sorghum root epigenetic landscape during limiting phosphorus conditions
Source: PubMed Central journal article supplement (PMC9107021; doi:10.1002/pld3.393), 2022-05-14
Supplement: PLD3-6-e393-s001.pdf [file PLD3-6-e393-s001.pdf]

## WRKY (Hypo)

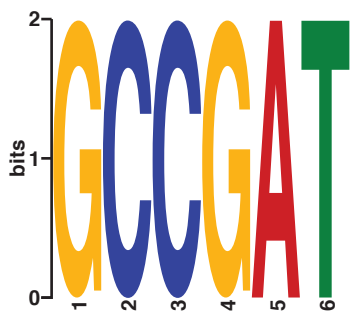

MEME (no SSC) 29.06.20 20:17

## NLP

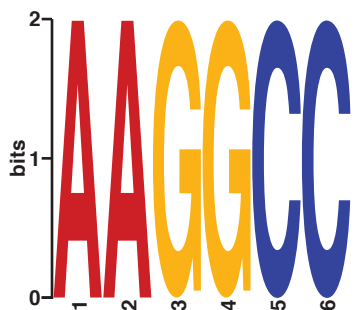

MEME (no SSC) 29.06.20 20:26

## AP2/EREB

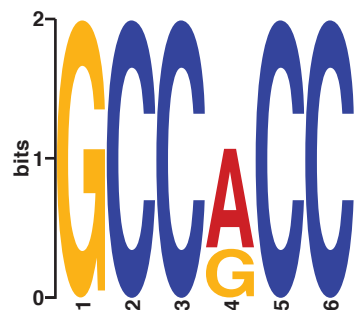

MEME (no SSC) 29.06.20 20:35

## TCP

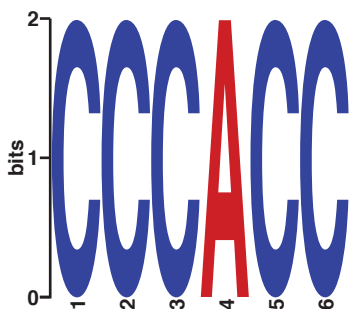

MEME (no SSC) 29.06.20 20:44

## NAC

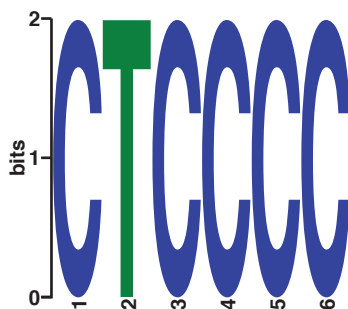

MEME (no SSC) 29.06.20 21:26

## bHLH (Hypo)

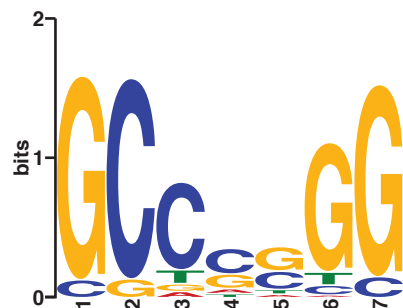

MEME (no SSC) 29.06.20 21:39

## Homeobox

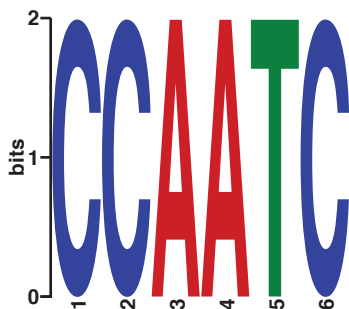

MEME (no SSC) 29.06.20 22:57

## ABI3 (Hypo)

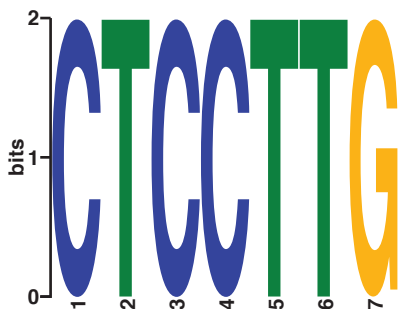

MEME (no SSC) 29.06.20 23:39
