# Supplementary material for: Sorghum root epigenetic landscape during limiting phosphorus conditions
Source: PubMed Central journal article supplement (PMC9107021; doi:10.1002/pld3.393), 2022-05-14

### AP2/EREB (Hyper)

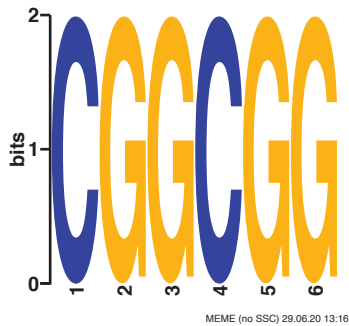

### C2H2 (Hyper)

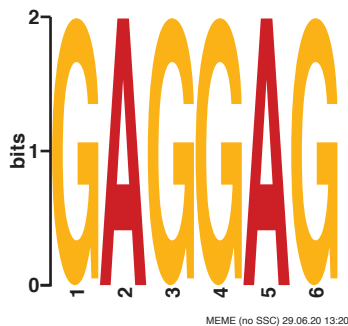

### TCP (Hyper)

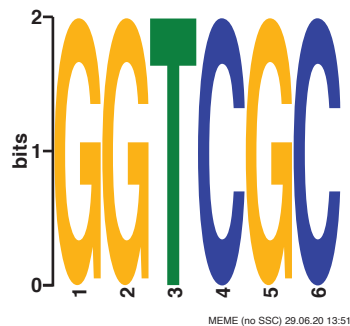

### bZIP (Hyper)

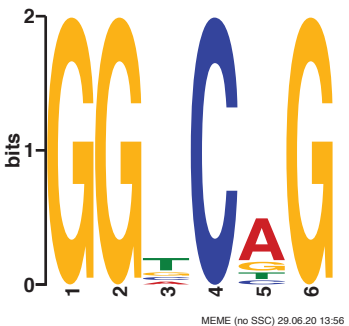

### bZIP (Hypo)

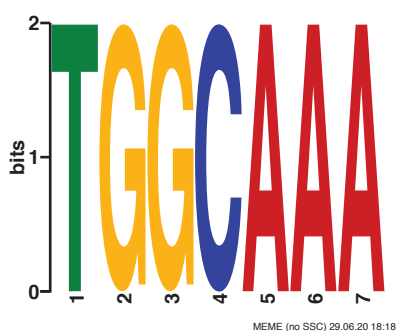

### NLP (Hypo)

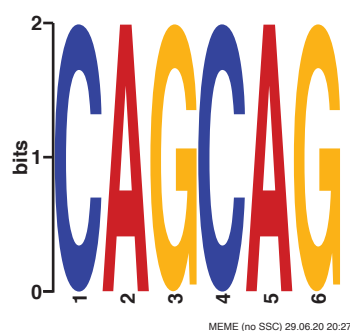

### BZR (Hyper)

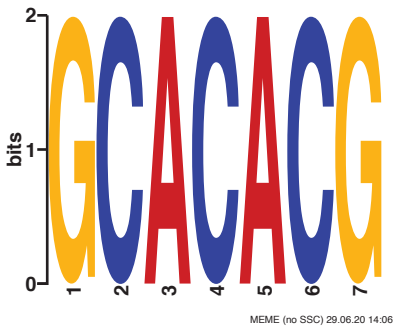

### NAC (Hypo)

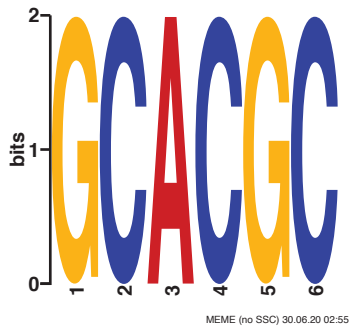

### Trihelix (Hypo)

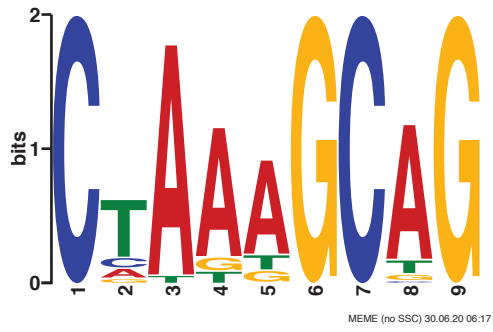

Supplement: PLD3-6-e393-s004.pdf [file PLD3-6-e393-s004.pdf]
