# Supplementary material for: Sorghum root epigenetic landscape during limiting phosphorus conditions
Source: PubMed Central journal article supplement (PMC9107021; doi:10.1002/pld3.393), 2022-05-14

## SORBI\_3008G179900 O-acetylserine (thiol) Lyase

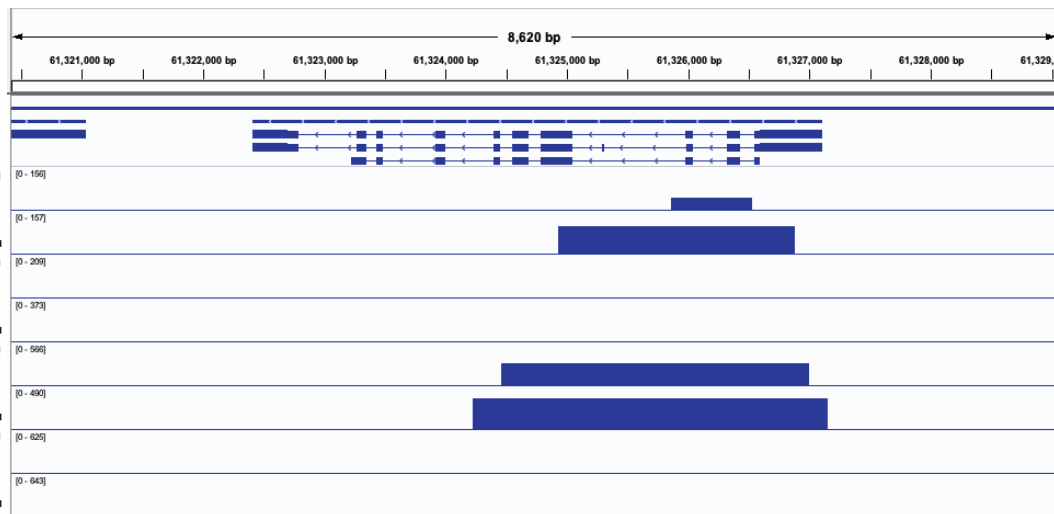

## SORBI\_3001G427300 Glycosyl Transferase

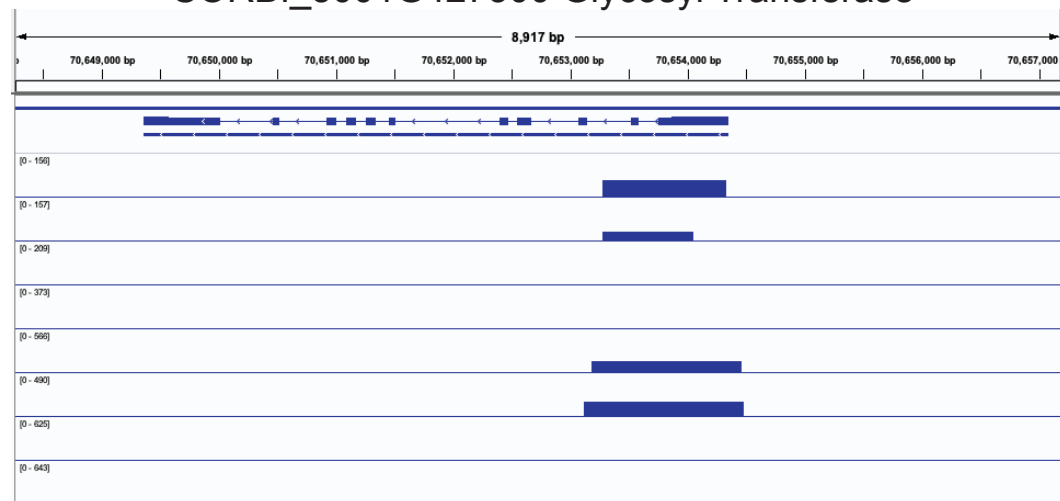

Supplement: PLD3-6-e393-s007.pdf [file PLD3-6-e393-s007.pdf]
