# Supplementary material for: Sorghum root epigenetic landscape during limiting phosphorus conditions
Source: PubMed Central journal article supplement (PMC9107021; doi:10.1002/pld3.393), 2022-05-14

Phosphorus  
Level

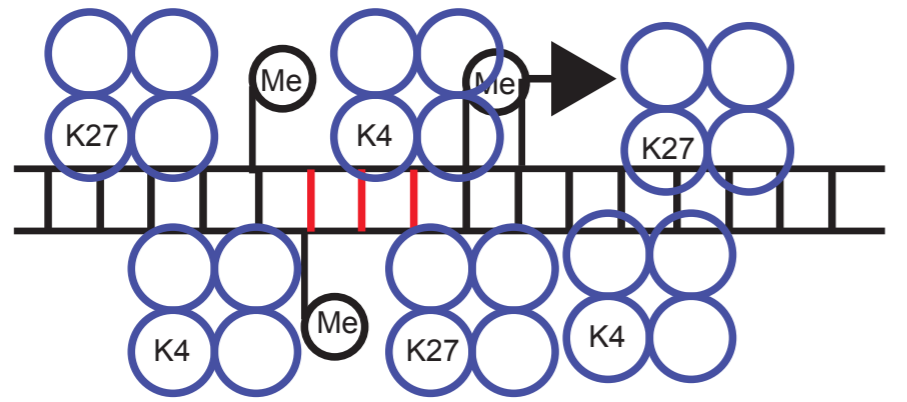

DNA Hypomethylation  
H3K4me3  
H3K27me3

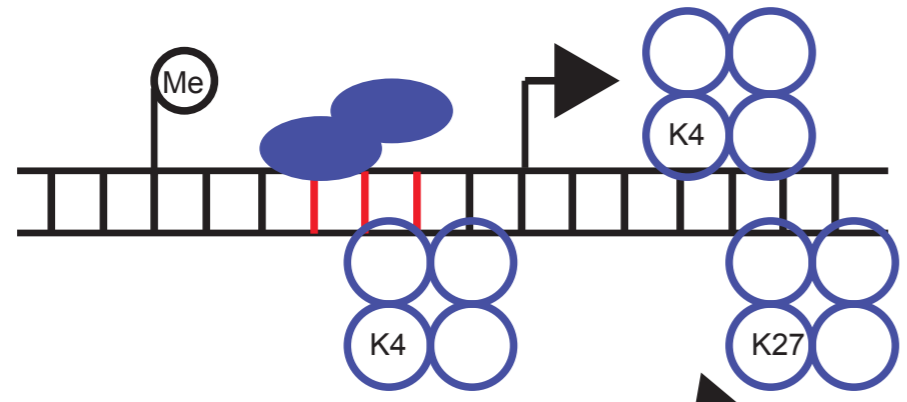

- NAC
- WKRY
- NLP
- LOB
- AP2

- Lateral Root Auxin Signaling
- Cysteine/Sulfer Metabolism
- PSI
- Apical Root Auxin Signaling
- Apical Root ABA Signaling
- SHR, SCR, RTCS*

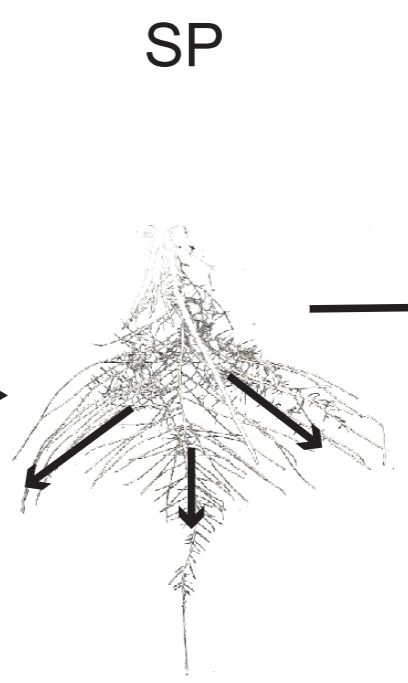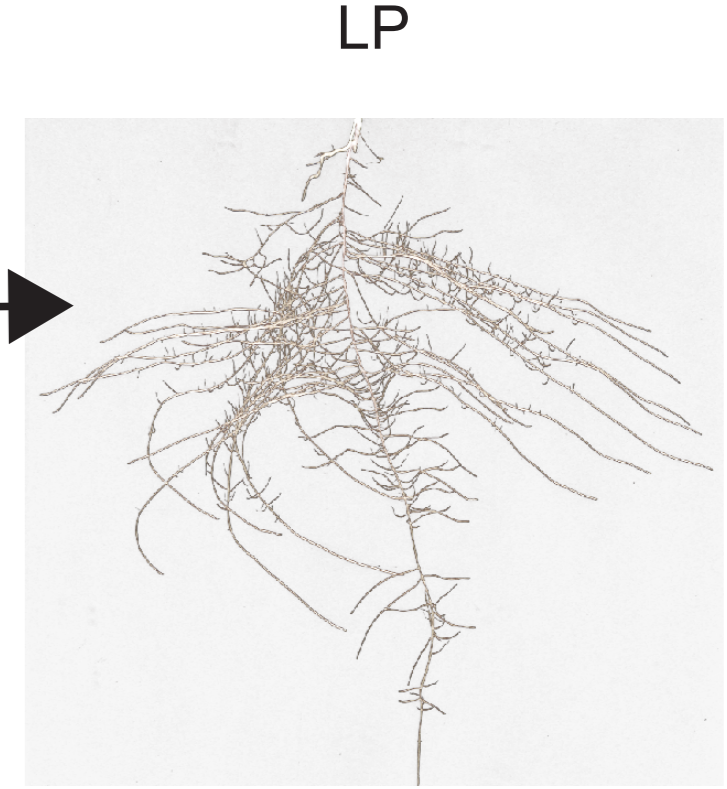

Supplement: PLD3-6-e393-s008.pdf [file PLD3-6-e393-s008.pdf]
