# Supplementary material for: Sorghum root epigenetic landscape during limiting phosphorus conditions
Source: PubMed Central journal article supplement (PMC9107021; doi:10.1002/pld3.393), 2022-05-14
Supplement: PLD3-6-e393-s010.pdf [file PLD3-6-e393-s010.pdf]

### AP2/EREB

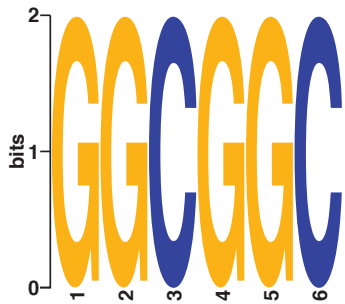

MEME (no SSC) 08.08.20 14:05

### LOB

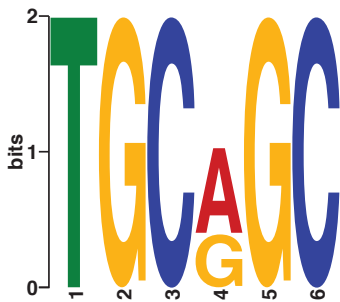

MEME (no SSC) 08.08.20 16:04

### WRKY

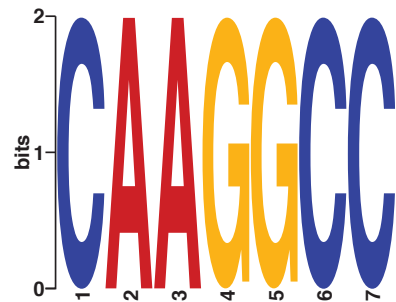

MEME (no SSC) 08.08.20 15:06

### TCP

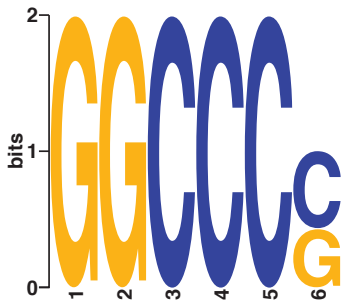

MEME (no SSC) 08.08.20 15:29

### EF2-like

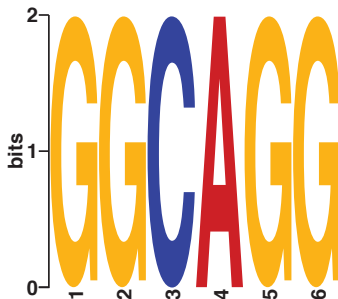

MEME (no SSC) 08.08.20 14:34

### NLP

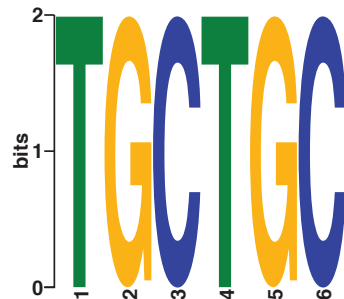

MEME (no SSC) 08.08.20 14:29
